# Supplementary material for: Effect of Solanum rostratum Dunal litter extract on its seedling growth
Source: Research Square preprint supplement (doi:10.21203/rs.3.rs-6829445/v1), 2025-06-18
Supplement: Supplementary file 1 [file b6ddd62e44e2577f4f548f1b.docx]

**Effect of *Solanum rostratum* Dunal litter extract on its seedling growth**

Yuxuan Ma1,a, Lamei Jiang1,a, Shuai Liu1,2, Huixian Liu1, Guohao Zhai3, Juan Qiu1, Shanshan Wang1,*, and Dunyan Tan1,4*

1 Xinjiang Key Laboratory for Ecological Adaptation and Evolution of Extreme Environment Biology, College of Life Sciences, Xinjiang Agricultural University,Urumqi, China

2 College of Chemistry, Xinjiang University, Urumqi, PR China

3 Xinjiang Key Laboratory of Soil and Plant Ecological Processes, College of Resources and Environment, Xinjiang Agricultural University, Urumqi, China

4 Xinjiang Institute of Ecology and Geography Chinese Academy of Sciences, Urumqi, China

a These authors contributed equally to this work

*corresponding. [SSWang0825@163.com](mailto:SSWang0825@163.com), [tandunyan@163.com](mailto:tandunyan@163.com)

**Summary**

**Fig. S1** Field observation of *Solanum rostratum* and the relative abundance of secondary metabolites in the soil.

**Fig. S2** The voucher specimen of *Solanum rostratum* Dunal.

**Fig. S3** Venn analysis of soil bacterial communities under different concentrations of ethanol extracts from litter based on OTU levels.

**Fig. S4** Correlation analysis between soil differential metabolites and differential bacteria.

The *Solanum rostratum* usually undergoes large-scale spread and expansion, and thus interspecific allelation is likely to occur. In Xinjiang, the plants of *S. rostratum* will wither and fall in October and they will be covered with snow in early November, By mid-March, when the snow melts, the fallen substances will affect the biological and abiotic factors of the soil under the effects of leaching and decomposition.

B

A


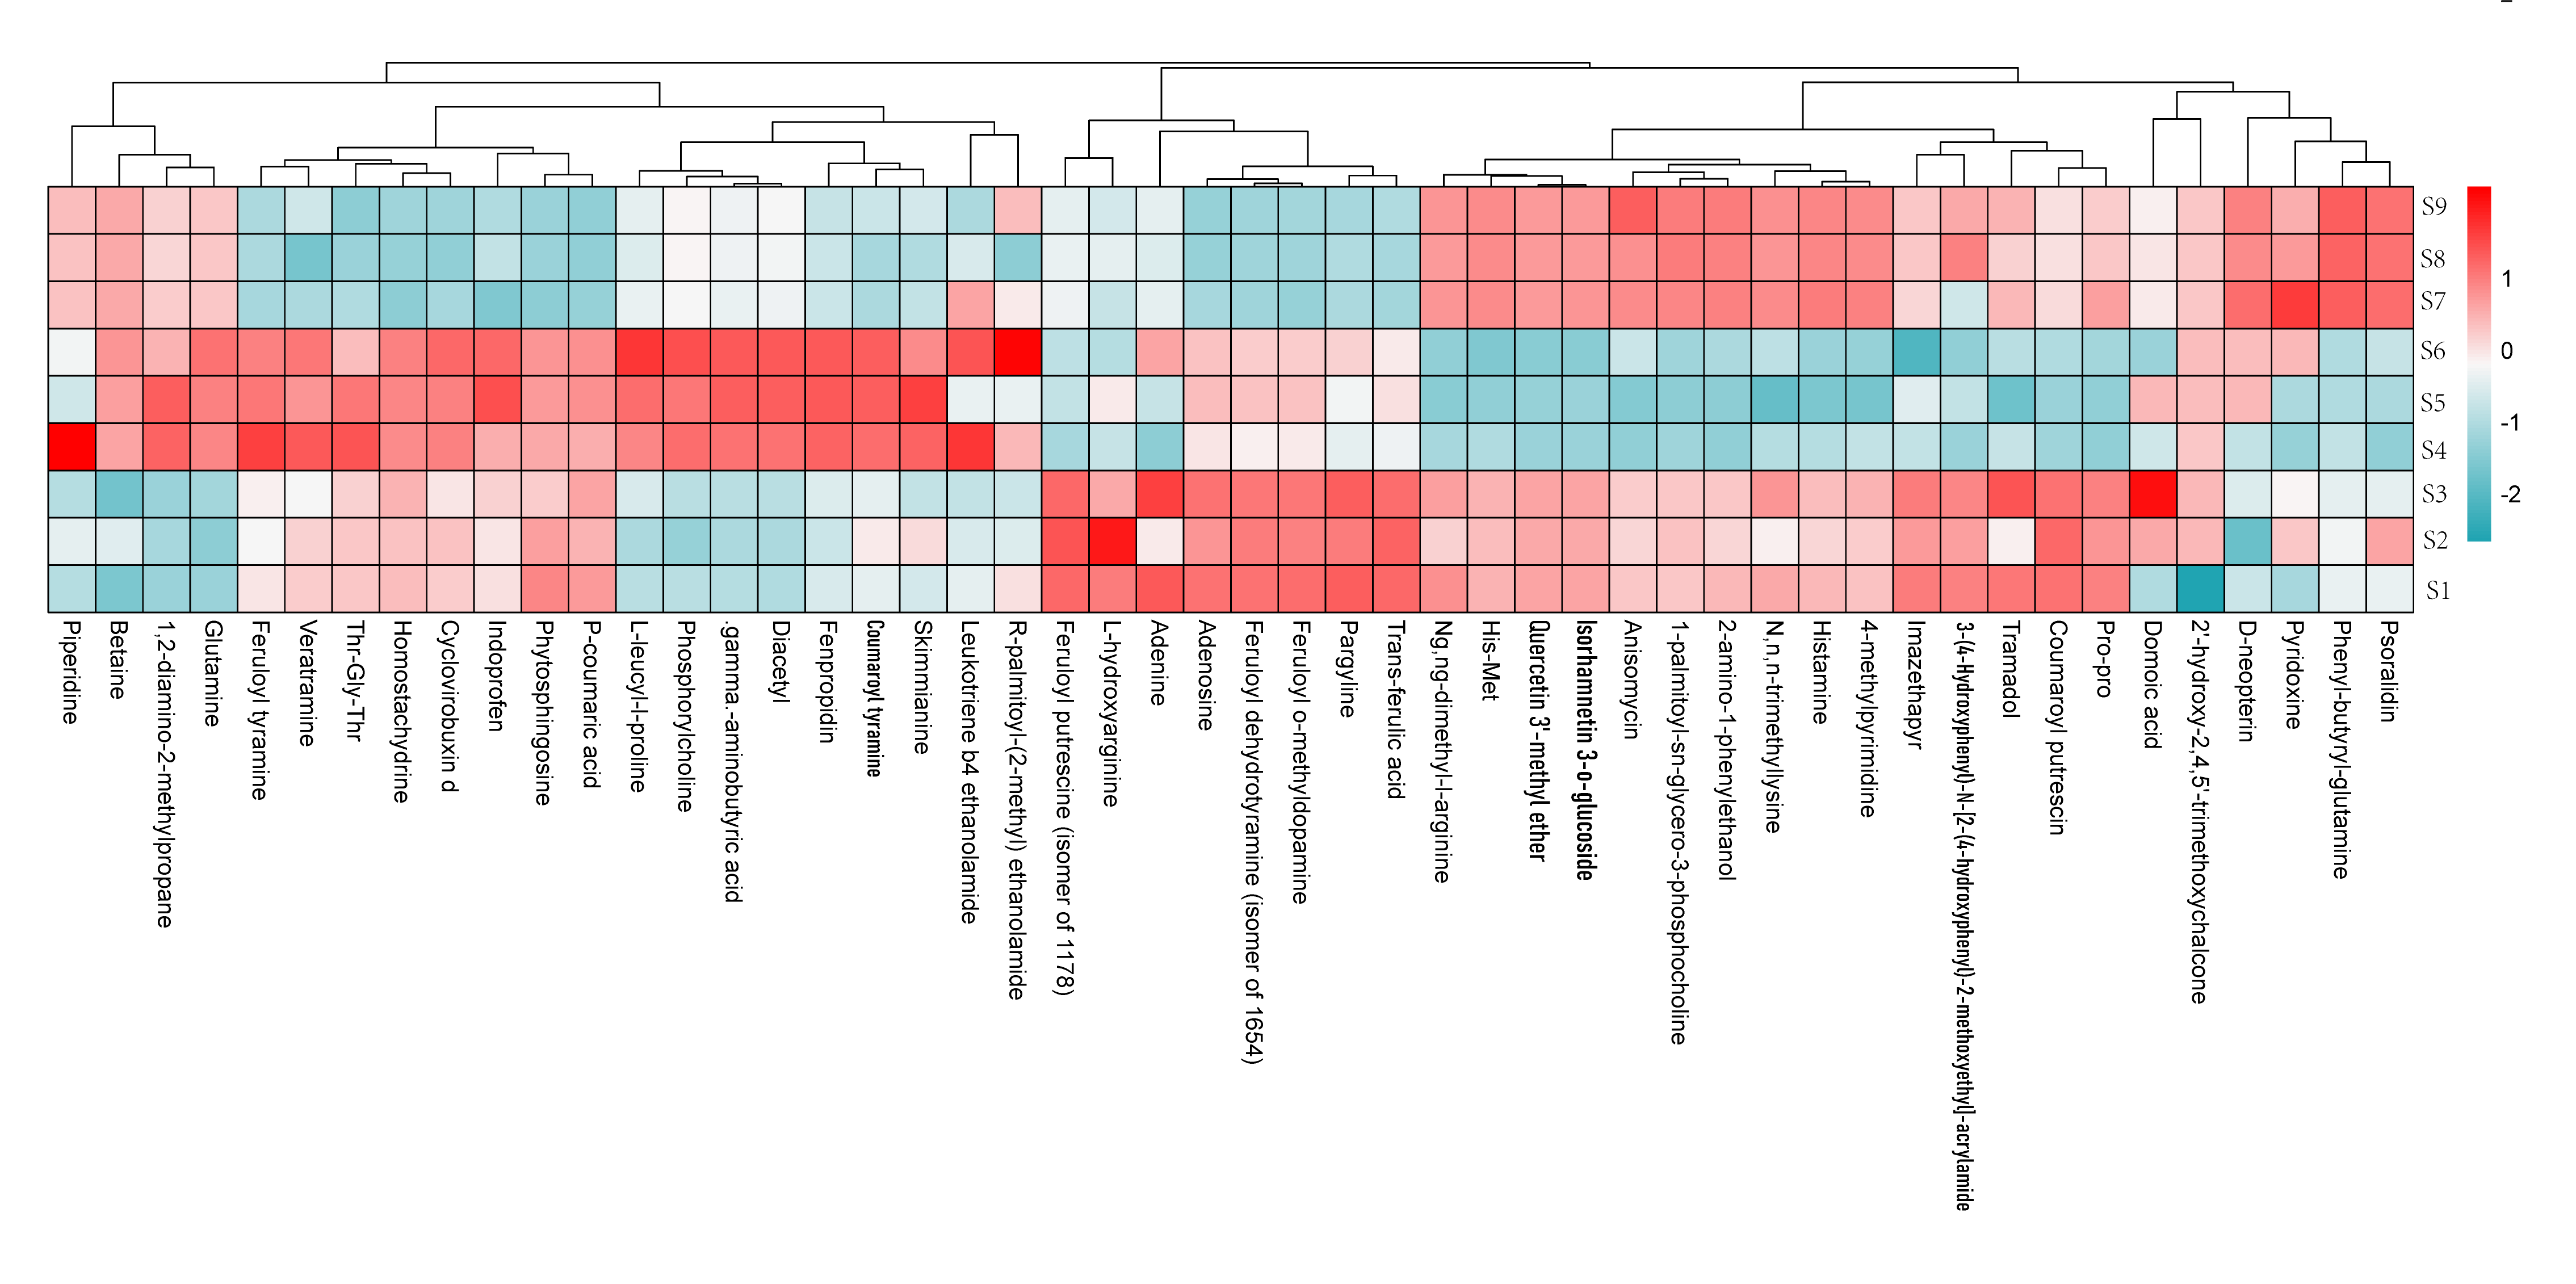

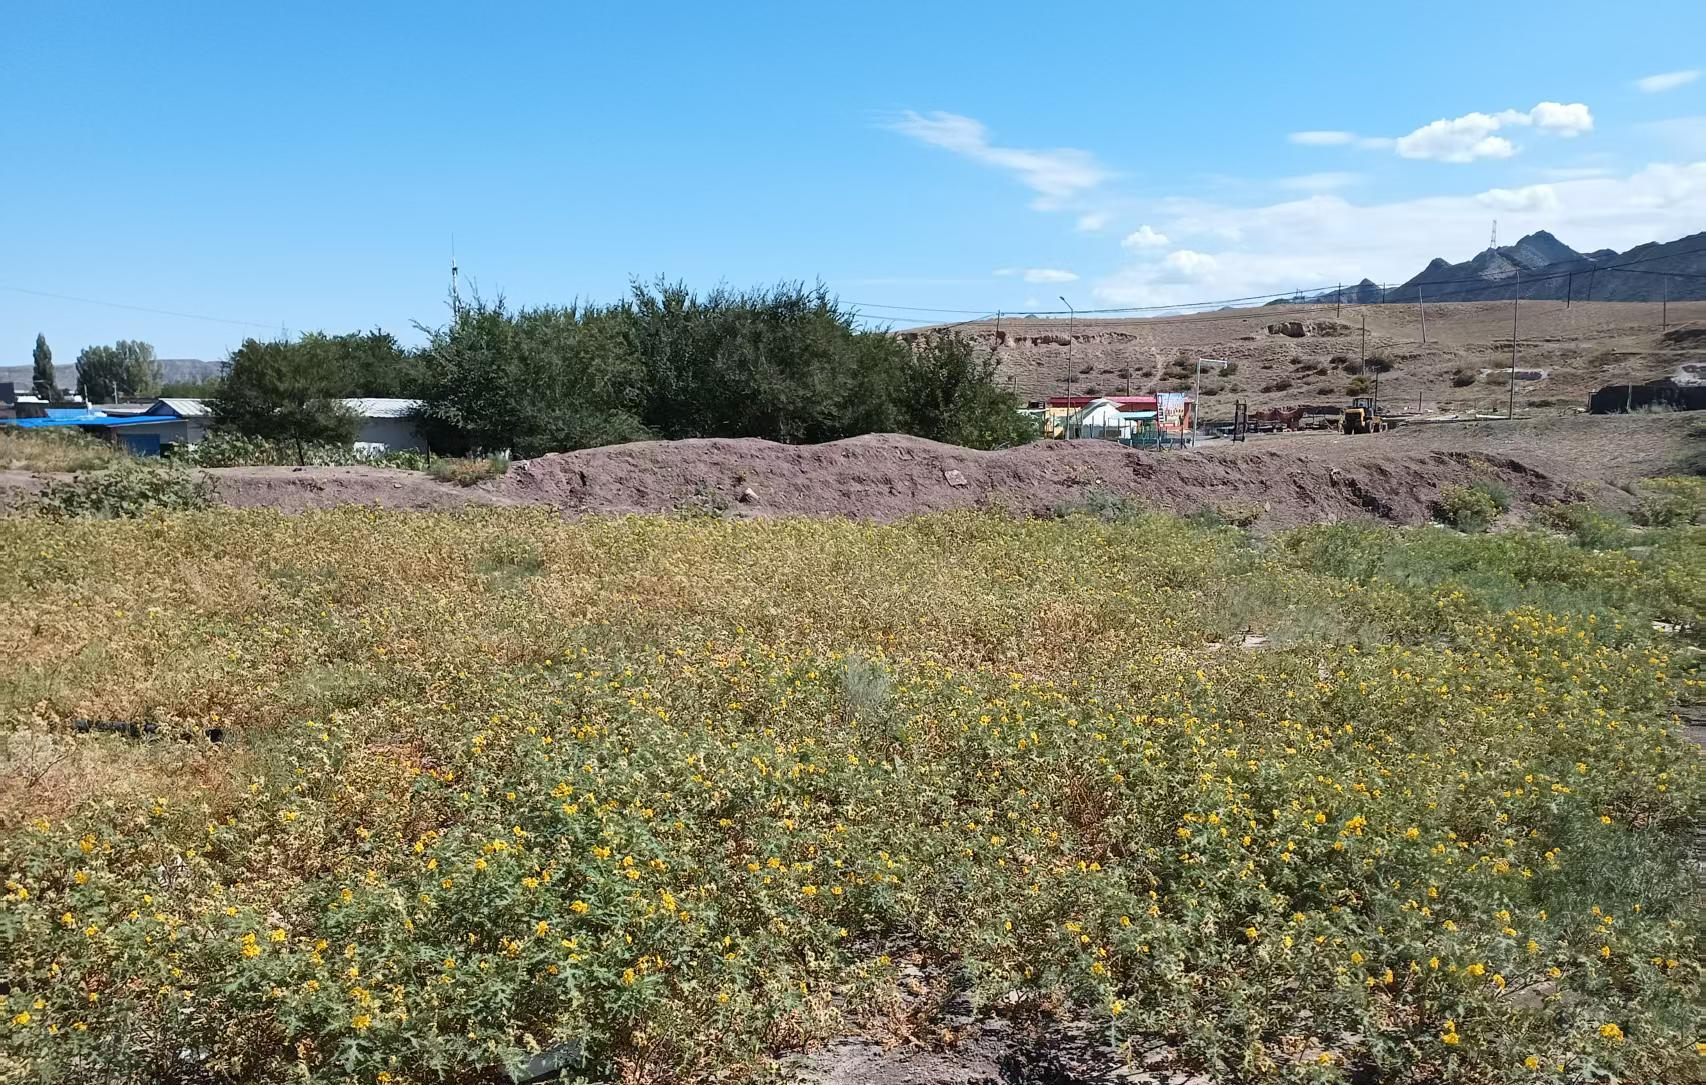

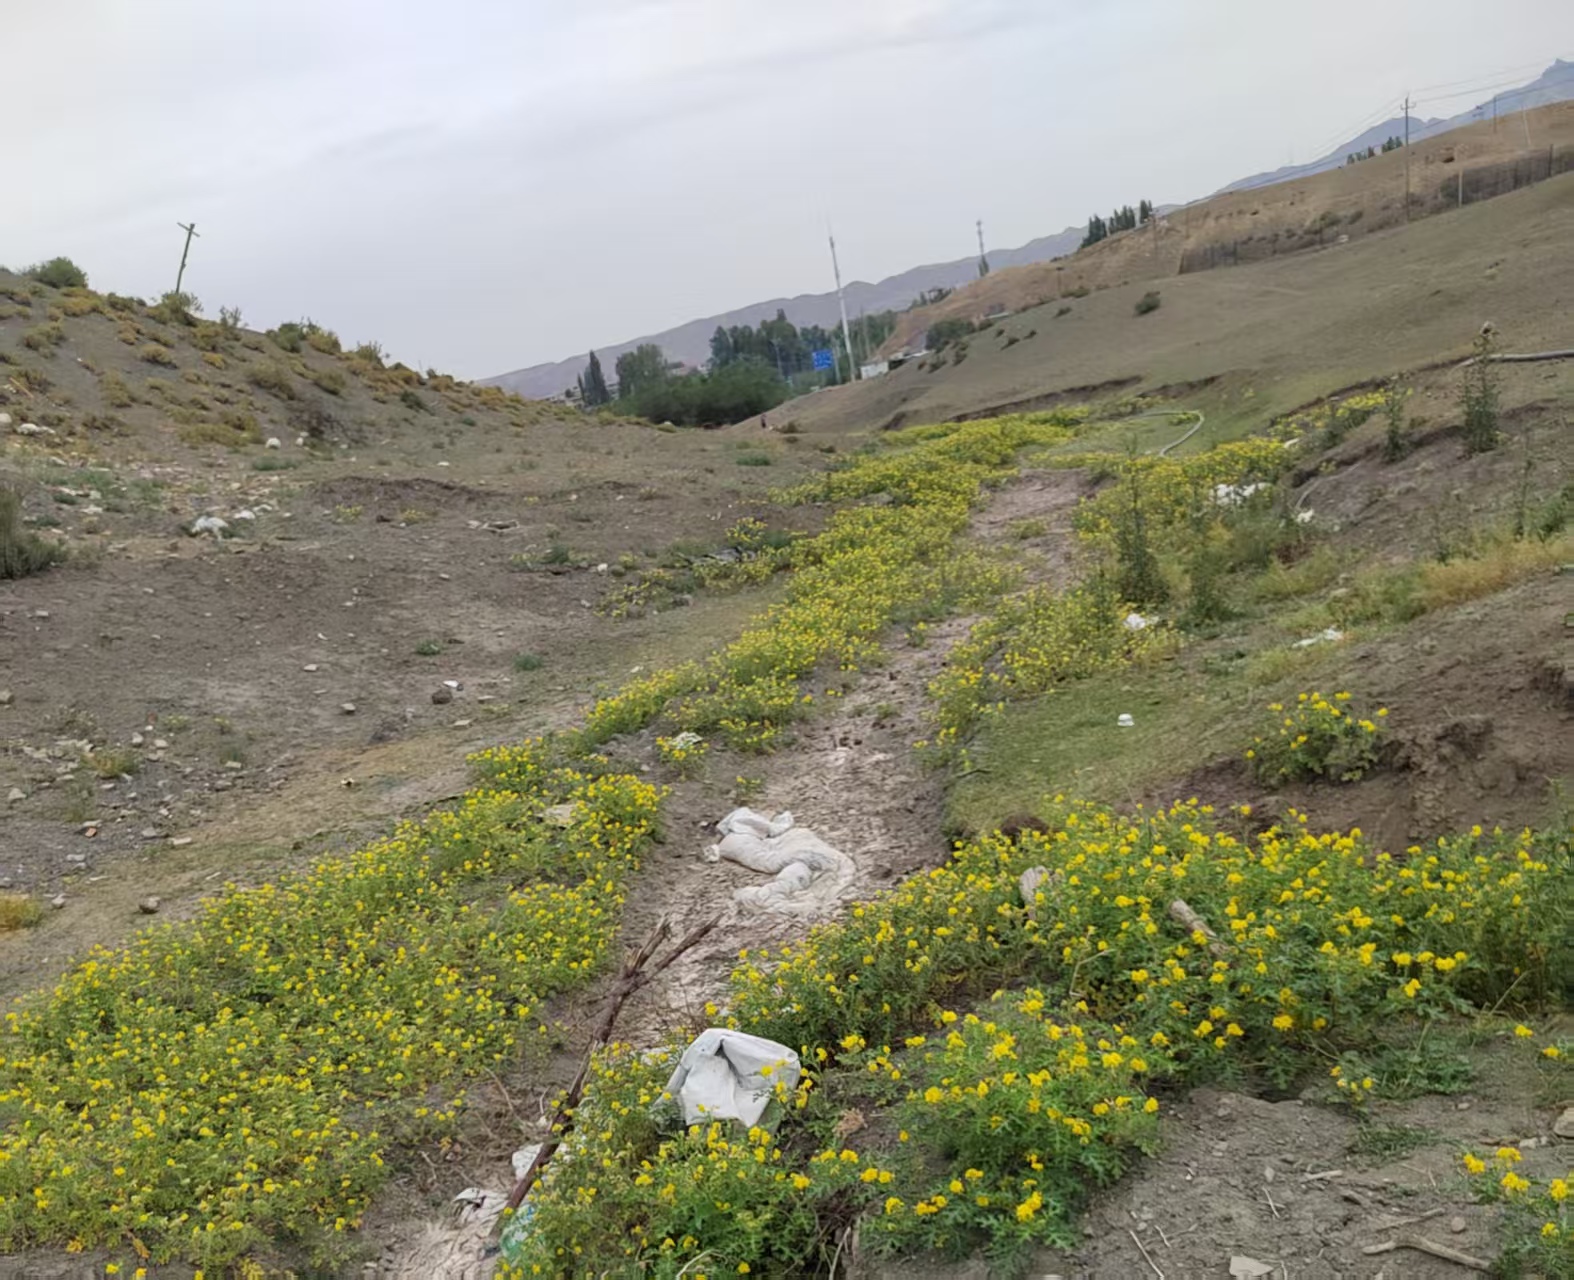

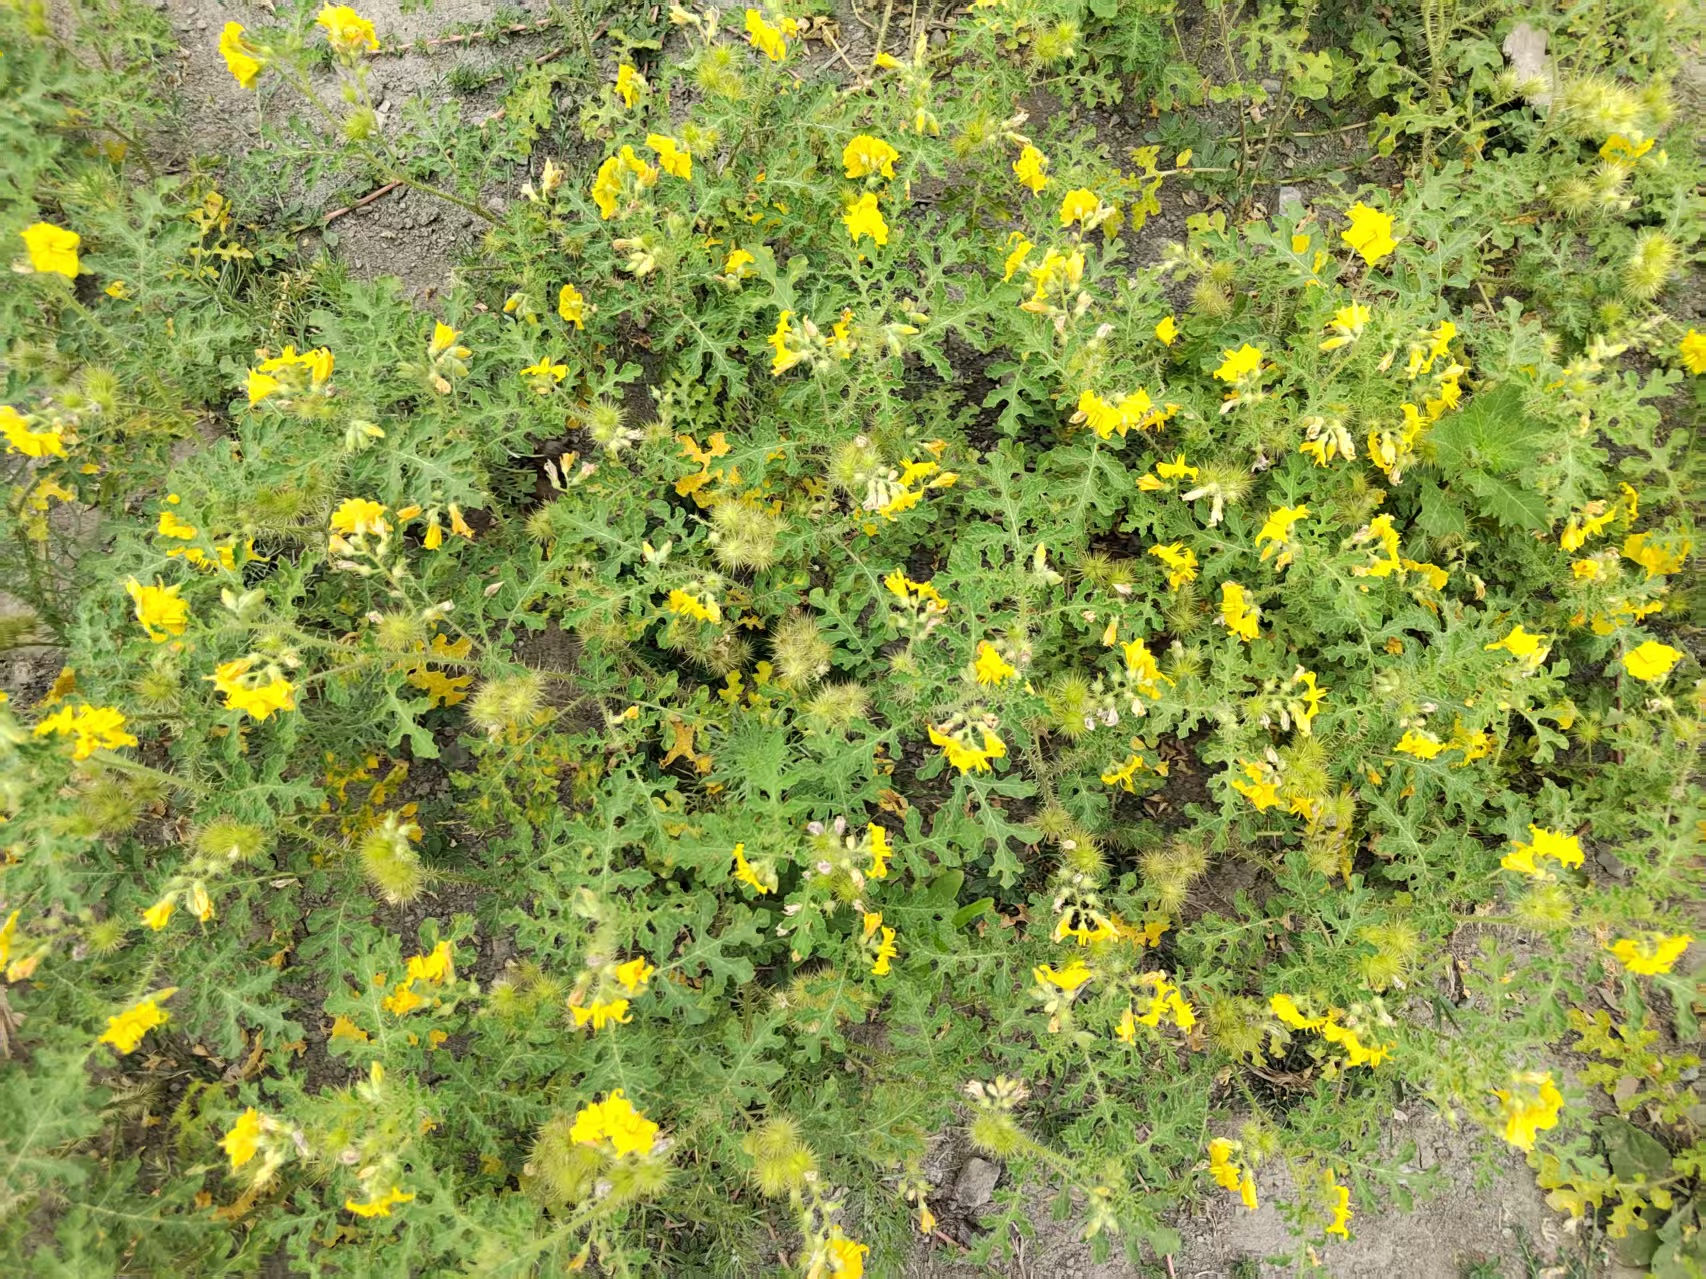

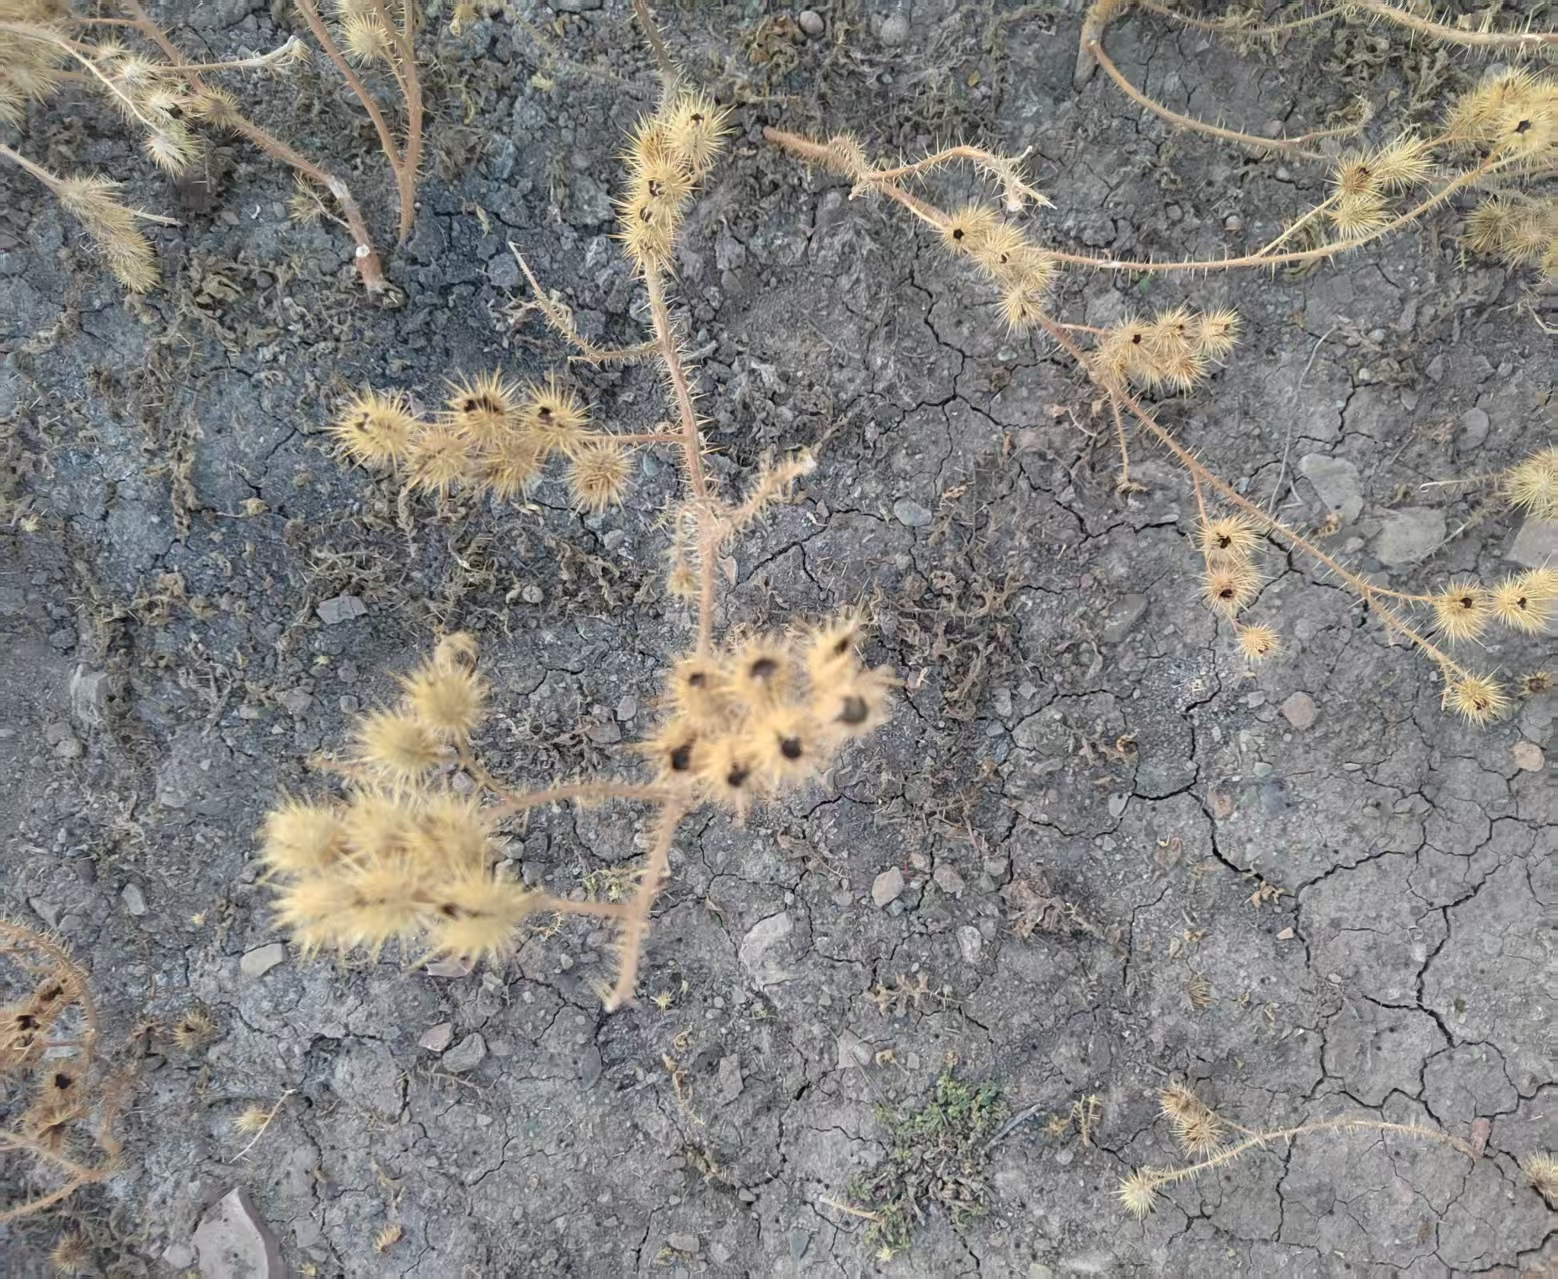

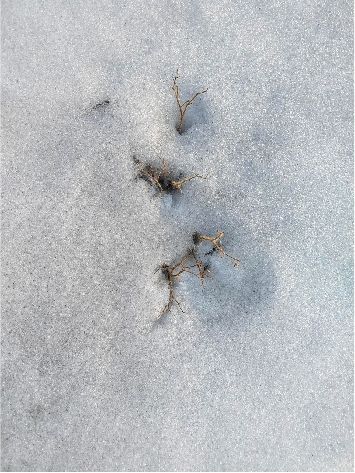

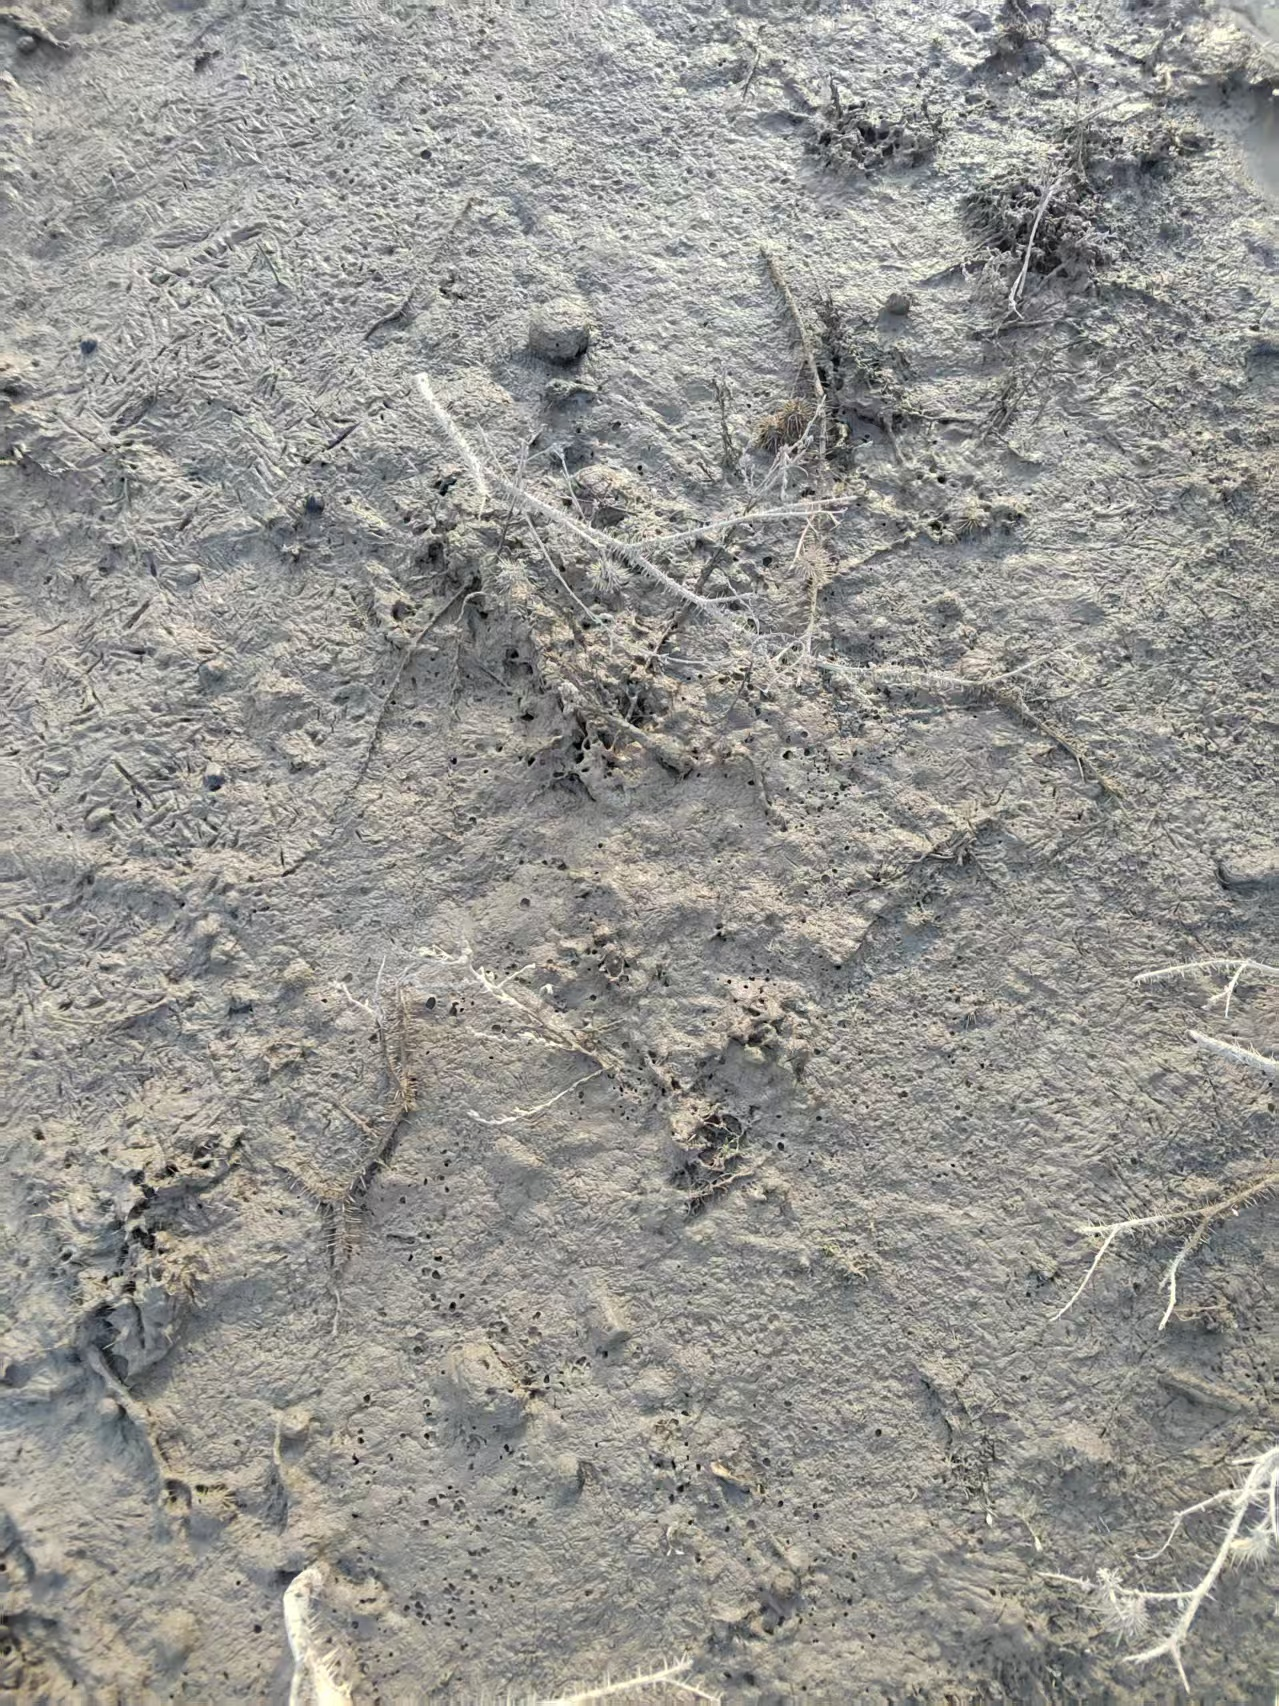


October

November

March

**Fig. S1** The invasion of *Solanum rostratum* in the wild (A), and the relative abundance of secondary metabolites in the soil (B)


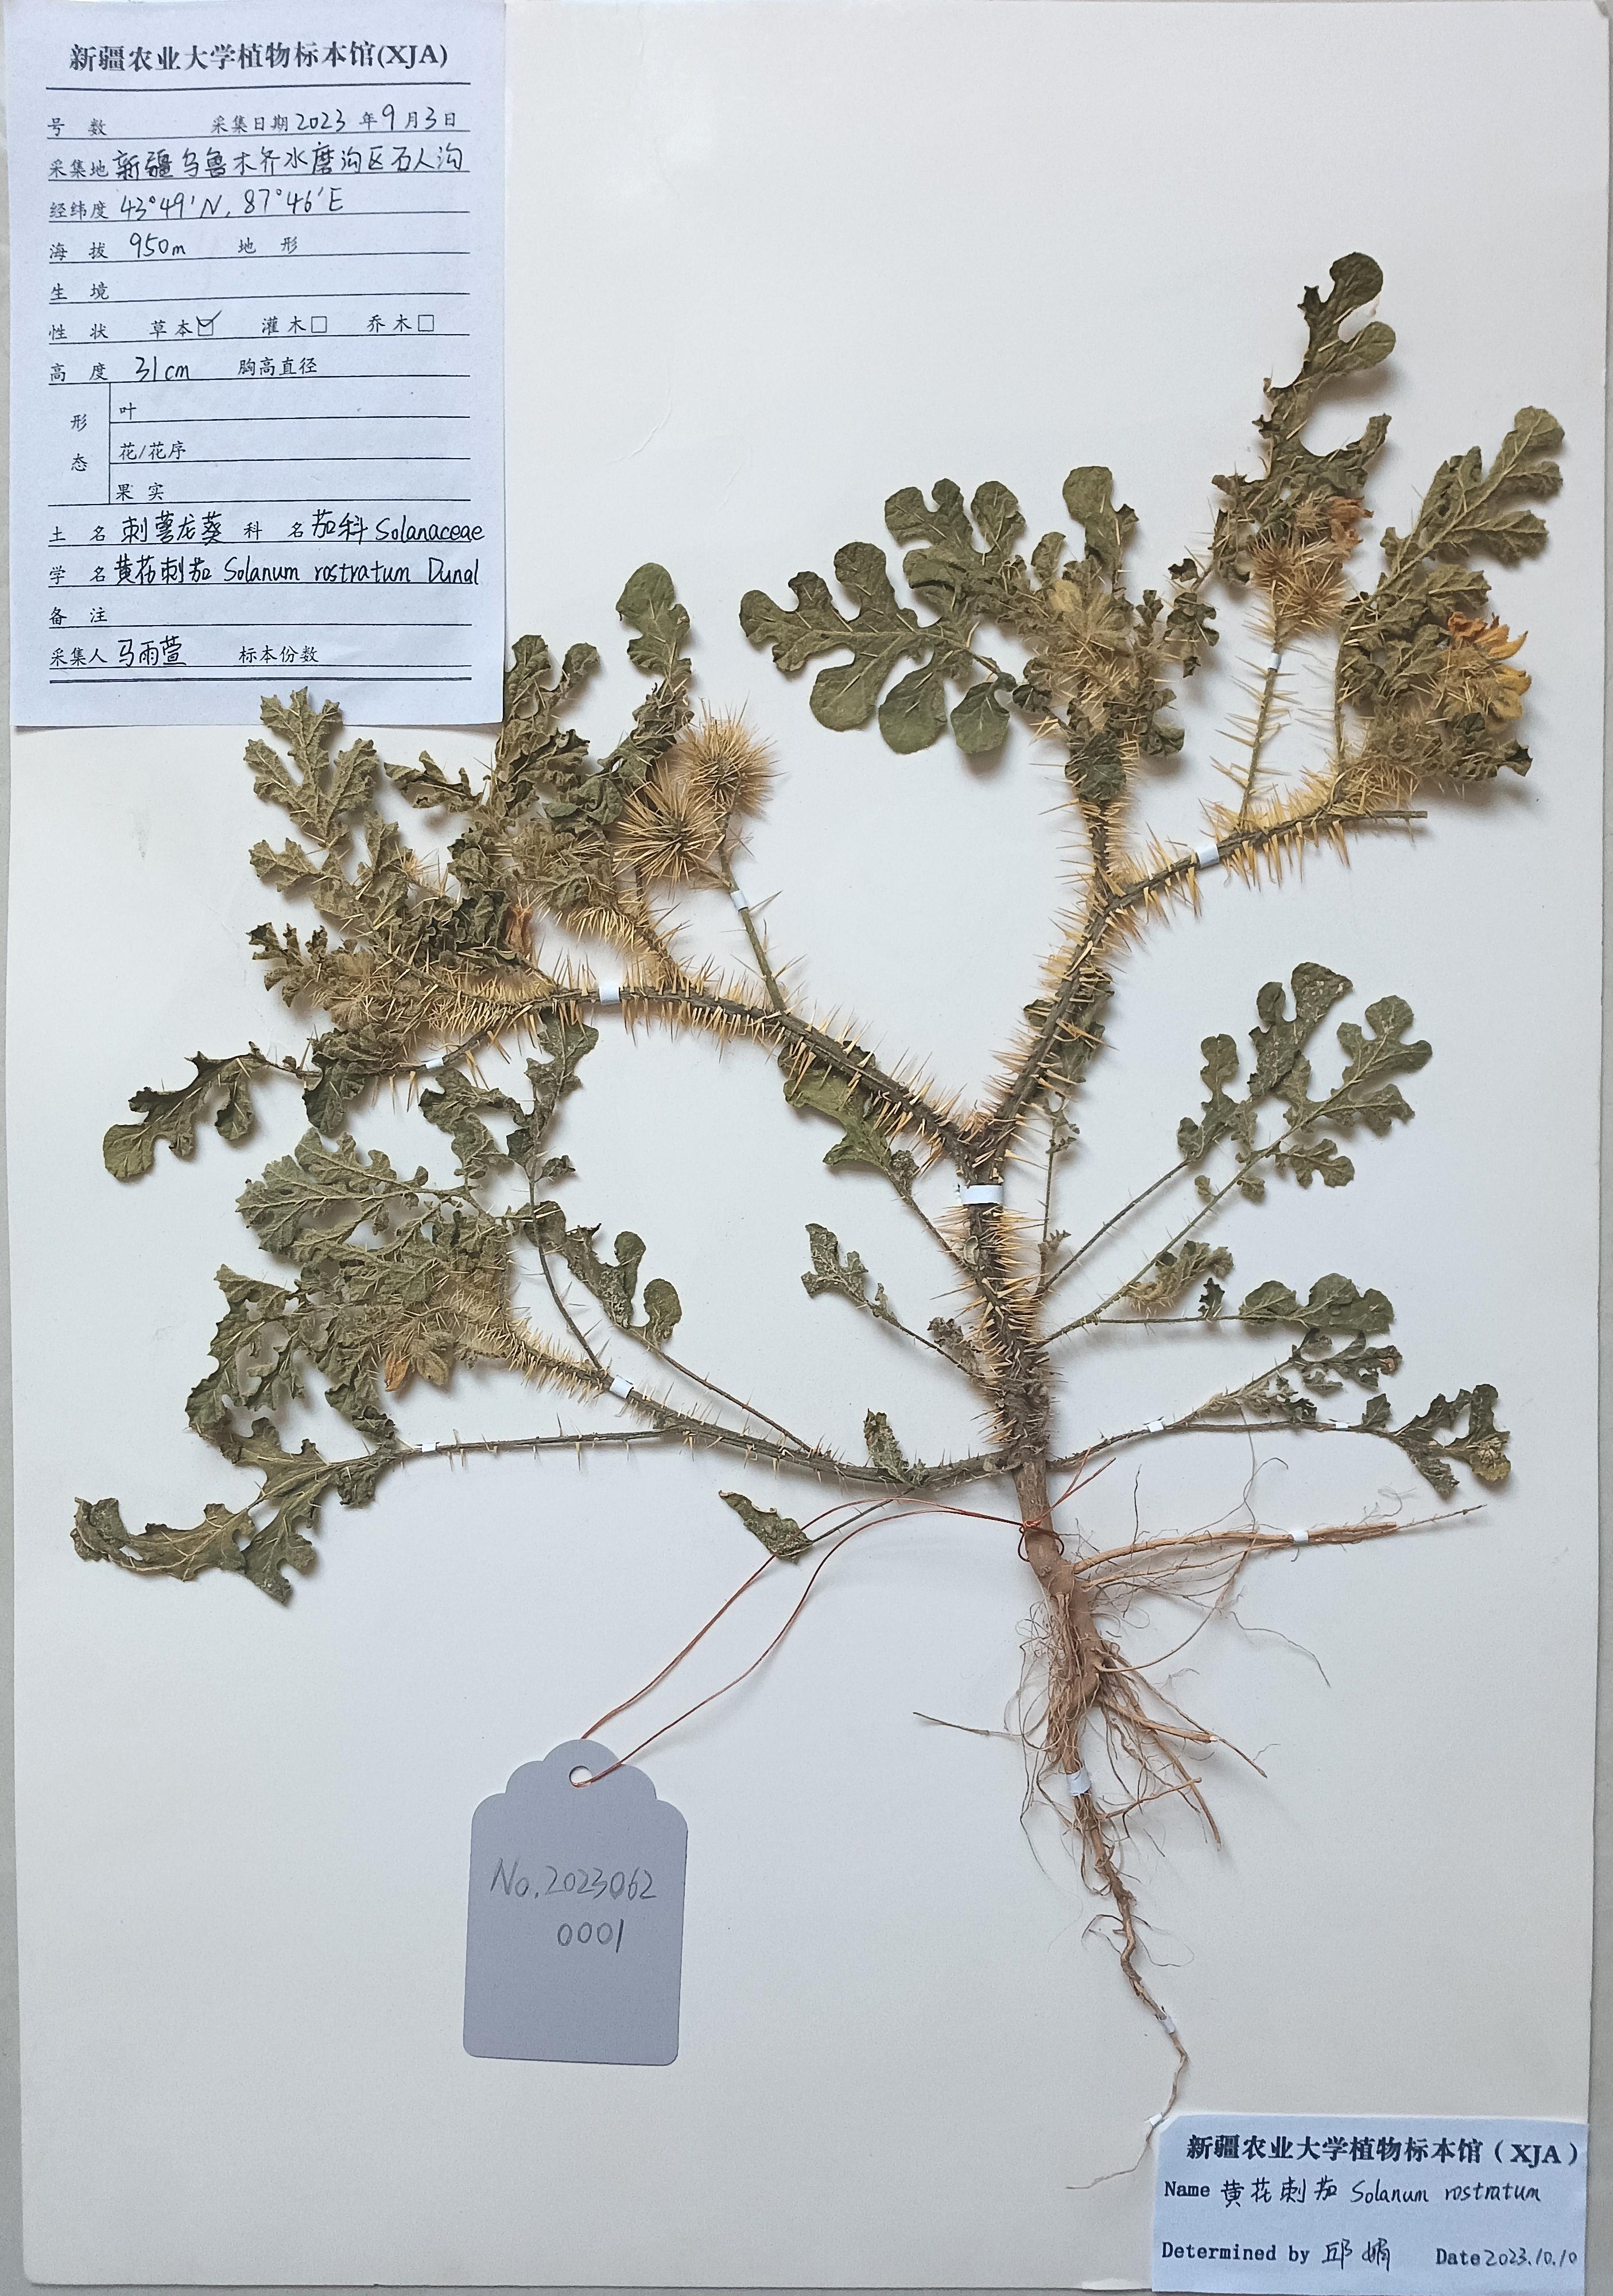


**Fig. S2** The voucher specimen of *Solanum rostratum* Dunal.


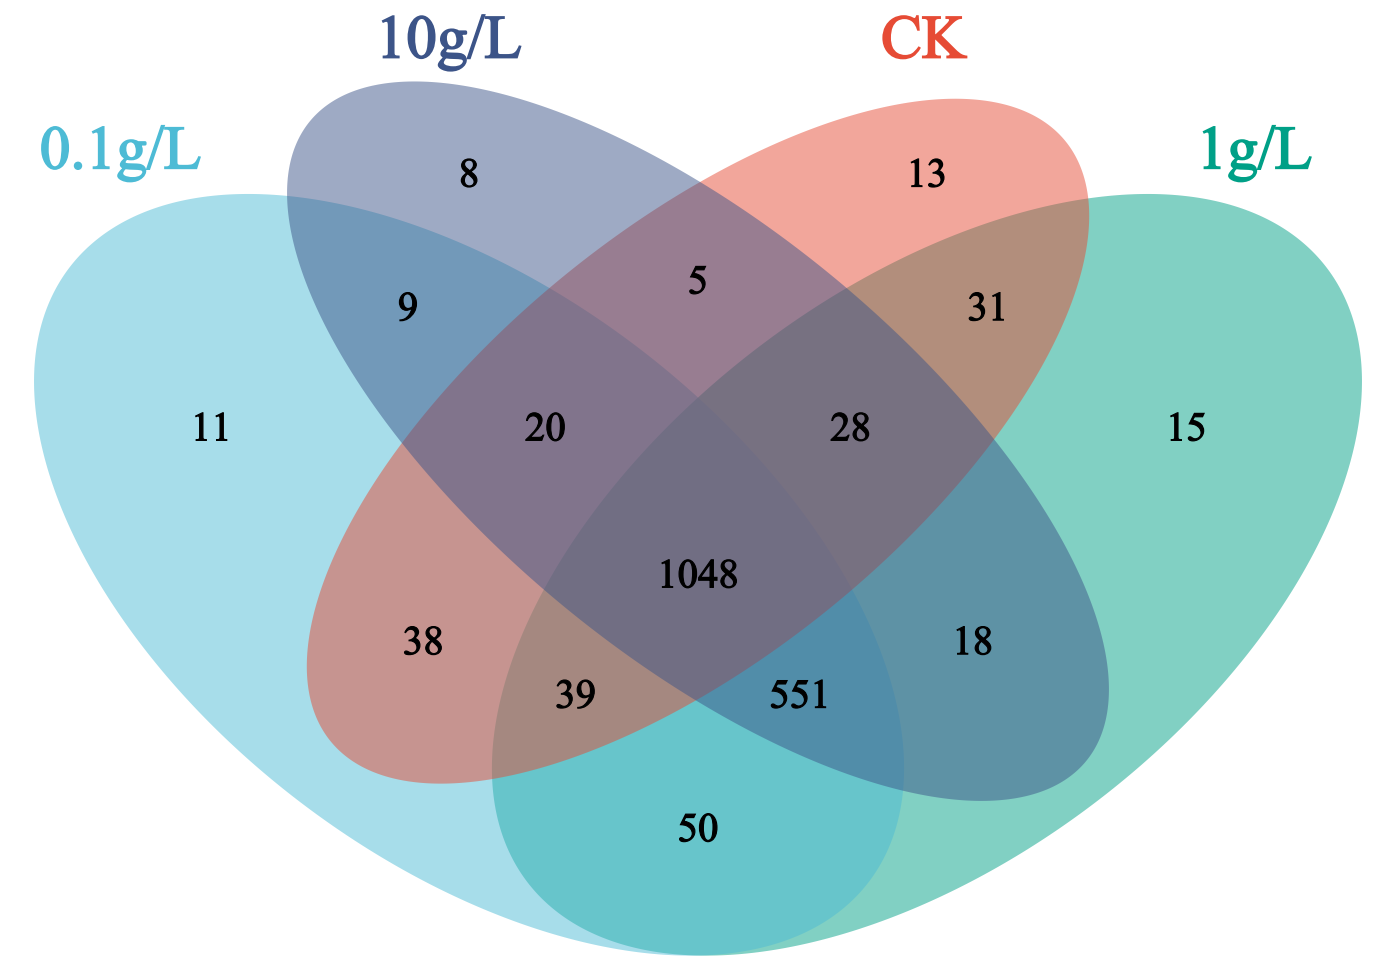


**Fig. S3** Venn analysis of soil bacterial communities under different concentrations of ethanol extracts from litter based on OTU levels.


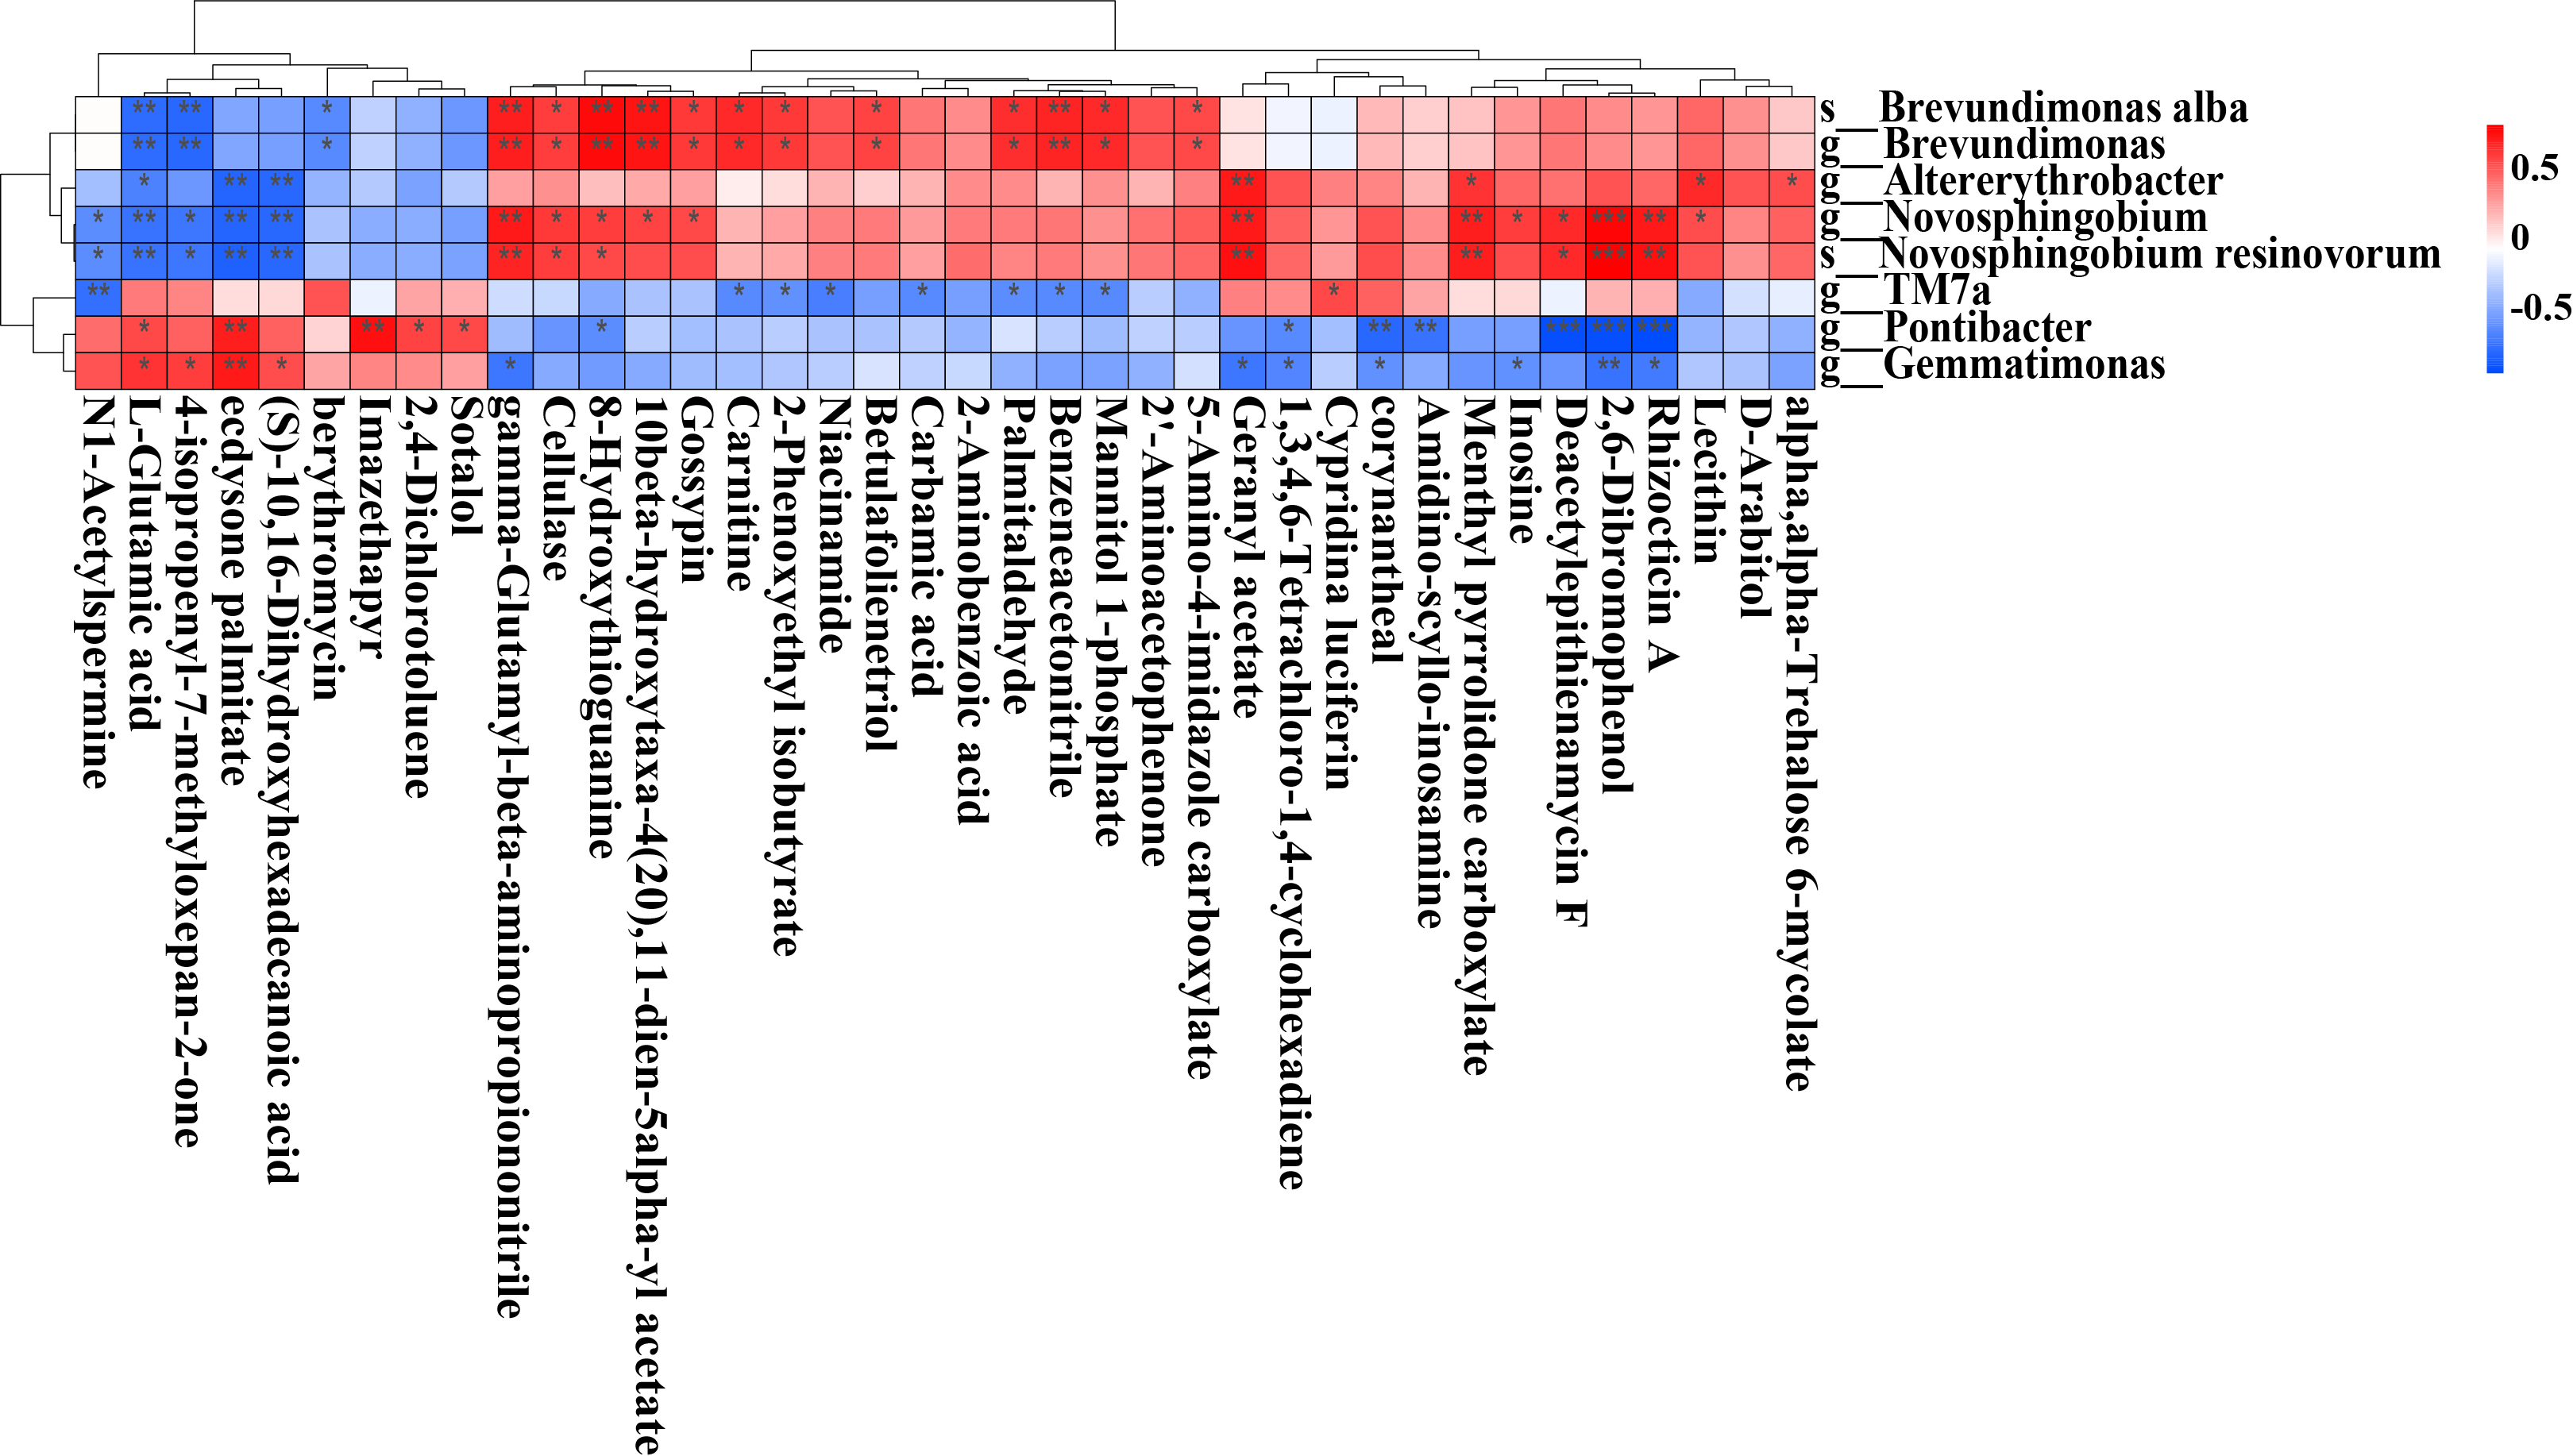


**Fig. S4** Correlation analysis between soil differential metabolites and differential bacteria

Note: Significance is indicated as * *p* < 0.05, ** *p* < 0.01, *** *p* < 0.001.
